# Supplementary material for: Assessing the readiness of Oxford Nanopore sequencing for clinical genomics applications
Source: HighWire-hosted journal article supplement (doi:10.1101/gr.280134.124), 2026-02-11
Supplement: Supplemental_Table_S1.xlsx [file Supplemental_Table_S1.xlsx]

## Sheet: Supplemental Table S1 
Supplemental Table S1. QC metrics and high-quality cutoffs to filter WGS datasets
QC metric	Definition	High-quality cutoff	Comment
Yield (Gb)	Total number of sequenced data expressed in gigabases (Gb)	≥70	High-quality cutoff defined to approximately achieve ~30× mapping coverage of the human genome (~3 Gb).
% bases >Q30 (>Q10 for ONT)	Proportion of sequenced bases with Phred quality (Q) greater than 30 (i.e. 1 sequencing error in 1,000 bases)	≥85	Given the higher read error rate of ONT, it is common to use >Q10 for this sequencing technology
Mapping rate (%)	Percentage of sequenced bases successfully mapped to the genome reference sequence	≥70
Mean coverage (×)	Mean effective coverage of the genome reference sequence after mapping	≥25×
% genome >10×	Percentage of the genome reference sequence covered by at least 10 sequencing reads	≥95
Het/hom ratio	Ration of heterozyogus genotypes relative to homozygous genotype calls	<2.5
