# Supplementary material for: Assessing the readiness of Oxford Nanopore sequencing for clinical genomics applications
Source: HighWire-hosted journal article supplement (doi:10.1101/gr.280134.124), 2026-02-11
Supplement: Supplemental_Table_S2.xlsx [file Supplemental_Table_S2.xlsx]

## Sheet: Supplemental Table S2
Supplemental Table S2. 17 Coriell reference samples used in this study
Highlighted in grey are the 3 samples used to determine genome-wide performance metrics instead of detection of point disease-causing mutations.
Evaluation	Sample ID	Description / phenotype	Variant type	JUST 4 SORTING	Genomic region(s)	Benchmarked variant(s)	Expected result
SNV/INDEL variant calling performance	GM24149	Parent-offspring trio (father)	SNV and INDEL	0	Genome wide, exome and CMRG	GiaB truth sets	High F1-score, precision and recall performance metrics values
	GM24143	Parent-offspring trio (mother)	SNV and INDEL	0	Genome wide, exome and CMRG	GiaB truth sets	High F1-score, precision and recall performance metrics values
	GM24385	Parent-offspring trio (child)	SNV and INDEL	0	Genome wide, exome and CMRG	GiaB truth sets	High F1-score, precision and recall performance metrics values
Detection of disease-causing mutations	GM13708	Breast Cancer (BC)	SNV	1	BRCA1	4808C>G	Heterozygous for mutation (C/G)
	GM27630	Mental Retardation Autosomal Dominant 40 (MRD40)	SNV	1	CHAMP1	2127T>G (de novo)	Heterozygous for mutation (T/G)
	GM27631	Unaffected father of GM27630	SNV	1	CHAMP1	2127T>G (de novo)	Total absence of mutation, i.e. homozygous reference allele (T/T)
	GM27632	Unaffected mother of GM27630	SNV	1	CHAMP1	2127T>G (de novo)	Total absence of mutation, i.e. homozygous reference allele (T/T)
	GM10354	Usher Syndrome Type IC (USH1C)	SNV	1	USH1C	216G>A	Homozygous for mutation (T/T) located on the complementary strand
	GM07829	Cystic Fibrosis (CF)	INDEL	2	CFTR	556delA	Heterozygous for mutation (AT/A)
	GM07830	Cystic Fibrosis (CF)	INDEL	2	CFTR	delF508 and 557delT	Heterozygous for mutation delF508 (ATCT/A) and 557delT (AT/A)
	GM08211	Cystic Fibrosis (CF)	INDEL	2	CFTR	delF508	Heterozygous for mutation (ATCT/A)
	GM07828	Cystic Fibrosis (CF)	INDEL	2	CFTR	delF508	Heterozygous for mutation (ATCT/A)
	GM04099	Muscular Dystrophy, Duchenne Type (DMD)	CNV (Deletion)	3	DMD	Exons 49-52 deletion	Heterozygous for a deletion of exons 49-52 in the dystrophin gene
	GM10684	Spinal Muscular Atrophy I (SMA1)	CNV (Deletion)	3	SMN1 and SMN2	Exons 7-8 deletion (SMN1)	Homozygous for a deletion of exons 7 and 8 in the SMN1 gene and has 2 copies of the SMN2 gene
	GM03990	Myotonic Dystrophy Type 1 (DM1)	STR	4	DMPK	CTG repeat	> 50 CTG repeats
	GM09145	Fragile X Syndrome (FMR1)	STR	4	FMR1	CGG repeat	> 200 CGG repeats
	GM03620	Huntington Disease (HD)	STR	4	HTT	CAG repeat	> 36 CAG repeats
