# Supplementary material for: Assessing the readiness of Oxford Nanopore sequencing for clinical genomics applications
Source: HighWire-hosted journal article supplement (doi:10.1101/gr.280134.124), 2026-02-11
Supplement: Supplemental_Table_S3.xlsx [file Supplemental_Table_S3.xlsx]

## Sheet: Supplemental Table S3
Supplemental Table S3. Summary of QC metrics across the 76-samples WGS dataset.
Yield is the total amount of DNA sequenced expressed in gigabases (Gb). The percentage of bases >Q30 and genome >10 are self-explanatory. Mapping rate is the percentage of sequenced bases that align to the reference genome. Mean coverage is the number of times a genomic region has been sequenced on average. Het/hom ratio consists of balance between heterozygous and homozygous variants (which is …
Metric	Cutoff	% samples passing cutoff	Illumina	MGI	ONT (R9)	ONT (R10)
Yield (Gb)	≥70	100	115 (93 - 131)	111 (103 - 171)	141 (122 - 163)	103 (72 - 198)
% bases >Q30 (>Q10 for ONT)	≥85	100	88.91 (88.41 - 89.53)	89.60 (88.46 - 91.22)	79.78 (77.80 - 82.60)	85.82 (78.30 - 88.30)
Mapping rate (%)	≥70	100	95.87 (95.38 - 96.43)	99.04 (98.91 - 99.36)	99.58 (99.41 - 99.77)	99.78 (99.69 - 99.87)
Mean coverage (×)	≥25×	100	32.87 (26.14 - 37.53)	38.08 (35.31 - 58.41)	45.09 (39.00 - 52.00)	33.24 (26.00 - 65.00)
% genome >10×	≥95	100	96.40 (95.78 - 96.84)	98.53 (98.22 - 99.34)	93.43 (93.00 - 94.00)	93.00 (92.00 - 94.00)
Het/hom ratio	<2.5	100	1.67 (1.58 - 2.18)	1.69 (1.58 - 2.13)	1.58 (1.48 - 1.95)	1.64 (1.52 - 1.98)
