# Supplementary material for: Assessing the readiness of Oxford Nanopore sequencing for clinical genomics applications
Source: HighWire-hosted journal article supplement (doi:10.1101/gr.280134.124), 2026-02-11
Supplement: Supplemental_Table_S4.xlsx [file Supplemental_Table_S4.xlsx]

## Sheet: Supplemental Table S4
Supplemental Table S4. Proportion of bases covered at >10× across clinically relevant genomic regions in GM24385.
Coverage metrics for sample GM24385 across three genomic subsets: medically relevant genes (MRG), all protein-coding genes, and non-repetitive regions, stratified by sequencing platform.
Region	Platform	Bases in region	Bases >10×	% Bases >10×
MRG	Illumina	23441210	23365889	99.68
MRG	MGI	23441210	23287004	99.34
MRG	ONT R9	23441210	23408462	99.86
MRG	ONT R10	23441210	23274515	99.29
Protein-Coding Genes	Illumina	80537331	80296852	99.7
Protein-Coding Genes	MGI	80537331	80034377	99.38
Protein-Coding Genes	ONT R9	80537331	80354181	99.77
Protein-Coding Genes	ONT R10	80537331	79989388	99.32
Non-repetitive	Illumina	2629174603	2622154893	99.73
Non-repetitive	MGI	2629174603	2615530887	99.48
Non-repetitive	ONT R9	2629174603	2628598631	99.98
Non-repetitive	ONT R10	2629174603	2611168126	99.32
