# Supplementary material for: Assessing the readiness of Oxford Nanopore sequencing for clinical genomics applications
Source: HighWire-hosted journal article supplement (doi:10.1101/gr.280134.124), 2026-02-11
Supplement: Supplemental_Table_S5.xlsx [file Supplemental_Table_S5.xlsx]

## Sheet: Supplemental Table S5
Supplemental Table S5. Performance calling of SNVs and INDELs genome-wide and in exonic regions for GM24143, GM24149 and GM24385.
Genome-wide performance is reported for all platforms, while ONT R9 and R10 were additionally evaluated in exonic regions. For both SNVs and INDELs, the table shows the number of total truth variants, true positives, false positives, and false negatives, as well as precision, recall, and F-score based on GIAB benchmarks.
		SNVs							INDELs
Sample ID	Platform	Total Truth Variants	True Positive	False Positive	False Negative	Precision	Recall	F1	Total Truth Variants	True Positive	False Positive	False Negative	Precision	Recall	F1
GM24143	Illumina	3454689	3324954	4793	129735	0.998561	0.962447	0.980171	576301	508309	1075	67992	0.997978	0.88202	0.936423
GM24143	MGI	3454689	3295937	12837	158752	0.996121	0.954047	0.97463	576301	501984	4213	74317	0.992014	0.871045	0.927602
GM24143	ONT R9	3454689	3335649	8411	119040	0.997485	0.965542	0.981254	576301	343504	96247	232797	0.784943	0.59605	0.677578
GM24143	ONT R9 Exon	69022	67005	140	2017	0.997915	0.970777	0.984159	9559	6249	1673	3310	0.79124	0.653729	0.715942
GM24143	ONT R10	3454689	3320994	12963	133695	0.996113	0.9613	0.978397	576301	395943	94974	180358	0.810621	0.687042	0.743733
GM24143	ONT R10 Exon	69022	66659	219	2363	0.996725	0.965765	0.981001	9559	7058	1471	2501	0.830158	0.738362	0.781574
GM24149	Illumina	3430611	3306258	6857	124353	0.997931	0.963752	0.980544	569180	501836	1596	67344	0.996958	0.881682	0.935784
GM24149	MGI	3430611	3279839	15155	150772	0.995402	0.956051	0.97533	569180	497052	4071	72128	0.992197	0.873277	0.928947
GM24149	ONT R9	3430611	3307589	27052	123022	0.991889	0.96414	0.977818	569180	336779	118154	232401	0.744613	0.591692	0.659402
GM24149	ONT R9 Exon	68506	66495	570	2011	0.991501	0.970645	0.980962	9330	6037	2198	3293	0.735754	0.647053	0.688558
GM24149	ONT R10	3430611	3306961	10576	123650	0.996813	0.963957	0.98011	569180	396423	82000	172757	0.832449	0.696481	0.758419
GM24149	ONT R10 Exon	68506	66398	241	2108	0.996385	0.969229	0.982619	9330	6933	1362	2397	0.838185	0.743087	0.787776
GM24385	Illumina	3459843	3344311	5937	115532	0.998228	0.966608	0.982164	587987	522440	1608	65547	0.997056	0.888523	0.939666
GM24385	MGI	3459843	3317200	13260	142643	0.99602	0.958772	0.977041	587987	516774	3905	71213	0.992799	0.878887	0.932377
GM24385	ONT R9	3459843	3352814	9041	107029	0.997311	0.969065	0.982986	587987	356401	99199	231586	0.786207	0.606138	0.684528
GM24385	ONT R9 Exon	68867	67257	141	1610	0.997908	0.976622	0.98715	9745	6439	1830	3306	0.781701	0.660749	0.716154
GM24385	ONT R10	3459843	3341339	12681	118504	0.996221	0.965749	0.980748	587987	405700	96362	182287	0.812226	0.689981	0.74613
GM24385	ONT R10 Exon	68867	67002	244	1865	0.996372	0.972919	0.984506	9745	7248	1603	2497	0.821928	0.743766	0.780896
