# Supplementary material for: Assessing the readiness of Oxford Nanopore sequencing for clinical genomics applications
Source: HighWire-hosted journal article supplement (doi:10.1101/gr.280134.124), 2026-02-11
Supplement: Supplemental_Table_S6.xlsx [file Supplemental_Table_S6.xlsx]

## Sheet: Supplemental Table S6
Supplemental Table S6. Performance calling SV (a) genome-wide and in (b) CMRG for GM24385.
A
Platform	True positive	False positive	False negative	Precision	Recall	F1
Illumina	7674	703	22017	0.916	0.258	0.403
MGI	3906	194	25785	0.952683	0.131555	0.231186
ONT R9	18632	1846	11059	0.91	0.627	0.743
ONT R10	19140	1987	10551	0.906	0.644	0.753
B
Platform	True positive	False positive	False negative	Precision	Recall	F1
Illumina	72	6	144	0.92	0.33	0.49
MGI	34	4	182	0.894737	0.157407	0.267717
ONT R9	189	13	27	0.94	0.88	0.9
ONT R10	192	12	24	0.94	0.89	0.91
