# Supplementary material for: Assessing the readiness of Oxford Nanopore sequencing for clinical genomics applications
Source: HighWire-hosted journal article supplement (doi:10.1101/gr.280134.124), 2026-02-11
Supplement: Supplemental_Table_S7.xlsx [file Supplemental_Table_S7.xlsx]

## Sheet: Supplemental Table S7
Supplemental Table S7. Genotyping results for the 11 evaluated pathogenic mutations across all 14 Coriell positive controls and all 4 sequencing platforms.
Each cell in the table shows the genotype for each variant (column) for each sample (row).
Highlighted in green and red, respectively, are the successfully (true positive) and inaccurate (false negatives) genotyped pathogenic variants. Blank denotes genotypes in which the pathogenic variant is absent (true negatives).
For “DMD EX49-52DEL", the value “1” indicates the deletion of exons 49–52 in DMD and 0 no deletion.
For “SMN1 EX7-8DEL", the left and right value of the “/” indicates the number of copies of SMN1 and SMN2 respectively – zero copies of SMN1 corresponding to the pathogenic deletion causing SMA. We only run Sillago SMN1/2 caller on the SMA-positive ONT R9 and R10 samples so it is absent (“-”) for the negative controls. For the STRs “DMPK CTG”, “FMR1 CGG” and “HTT CAG” we provide the STR copy numbe…
Sample ID	Sequencing	BRCA1 4808C>G	CHAMP1 2127T>G	USH1C 216G>A	CFTR 556delA	CFTR delF508	CFTR 557delT	DMD EX49-52DEL	SMN1 EX7-8DEL	DMPK CTG	FMR1 CGG	HTT CAG
GM13708	Illumina	C / G	T / T	C / C	A / A	ATCT / ATCT	AT / AT	0 / 0	2 / 2	5 / 25	23 / 32	17 / 17
GM13708	MGI	C / G	T / T	C / C	A / A	ATCT / ATCT	AT / AT	0 / 0	2 / 0	5 / 25	23 / 32	17 / 17
GM13708	ONT R9	C / G	T / T	C / C	A / A	ATCT / ATCT	AT / AT	0 / 0	-	6 / 24	23 / 32	17 / 17
GM13708	ONT R10	C / G	T / T	C / C	A / A	ATCT / ATCT	AT / AT	0 / 0	-	6 / 24	23 / 32	17 / 19
GM27630	Illumina	G / G	T / G	C / C	A / A	ATCT / ATCT	AT / AT	0 / 0	2 / 1	11 / 13	30	15 / 25
GM27630	MGI	G / G	T / G	C / C	A / A	ATCT / ATCT	AT / AT	0 / 0	2 / 1	11 / 13	27	15 / 25
GM27630	ONT R9	G / G	T / G	C / C	A / A	ATCT / ATCT	AT / AT	0 / 0	-	12 / 12	30	16 / 25
GM27630	ONT R10	G / G	T / G	C / C	A / A	ATCT / ATCT	AT / AT	0 / 0	-	13 / 13	30	17 / 25
GM27631	Illumina	G / G	T / T	C / C	A / A	ATCT / ATCT	AT / AT	0 / 0	2 / 2	12 / 13	30	24 / 25
GM27631	MGI	G / G	T / T	C / C	A / A	ATCT / ATCT	AT / AT	0 / 0	2 / 2	12 / 13	29	24 / 25
GM27631	ONT R9	G / G	T / T	C / C	A / A	ATCT / ATCT	AT / AT	0 / 0	-	13 / 13	30	20 / 24
GM27631	ONT R10	G / G	T / T	C / C	A / A	ATCT / ATCT	AT / AT	0 / 0	-	13 / 13	30	24 / 24
GM27632	Illumina	G / G	T / T	C / C	A / A	ATCT / ATCT	AT / AT	0 / 0	2 / 1	11 / 13	30 / 36	15 / 17
GM27632	MGI	G / G	T / T	C / C	A / A	ATCT / ATCT	AT / AT	0 / 0	2 / 1	11 / 13	26 / 36	15 / 17
GM27632	ONT R9	G / G	T / T	C / C	A / A	ATCT / ATCT	AT / AT	0 / 0	-	12 / 14	33 / 33	17 / 17
GM27632	ONT R10	G / G	T / T	C / C	A / A	ATCT / ATCT	AT / AT	0 / 0	-	12 / 12	30 / 36	17 / 17
GM10354	Illumina	G / G	T / T	T / T	A / A	ATCT / ATCT	AT / AT	0 / 0	2 / 2	14 / 26	32	0 / 17
GM10354	MGI	G / G	T / T	T / T	A / A	ATCT / ATCT	AT / AT	0 / 0	2 / 3	14 / 26	32	0 / 17
GM10354	ONT R9	G / G	T / T	T / T	A / A	ATCT / ATCT	AT / AT	0 / 0	-	15 / 25	32	11 / 11
GM10354	ONT R10	G / G	T / T	T / T	A / A	ATCT / ATCT	AT / AT	0 / 0	-	15 / 26	32	20 / 20
GM07829	Illumina	G / G	T / T	C / C	A / A	ATCT / ATCT	AT / A	0 / 0	2 / 1	5 / 5	30 / 30	16 / 17
GM07829	MGI	G / G	T / T	C / C	A / A	ATCT / ATCT	AT / A	0 / 0	2 / 1	5 / 5	30 / 30	17 / 17
GM07829	ONT R9	G / G	T / T	C / C	A / A	ATCT / ATCT	AT / A	0 / 0	-	6 / 6	30 / 30	14 / 17
GM07829	ONT R10	G / G	T / T	C / C	A / A	ATCT / ATCT	AT / A	0 / 0	-	6 / 6	30 / 30	17 / 17
GM07830	Illumina	G / G	T / T	C / C	A / A	ATCT / A	AT / A	0 / 0	2 / 2	5 / 13	30 / 36	0 / 17
GM07830	MGI	G / G	T / T	C / C	A / A	ATCT / A	AT / A	0 / 0	2 / 2	5 / 13	32 / 42	0 / 17
GM07830	ONT R9	G / G	T / T	C / C	A / A	ATCT / A	AT / A	0 / 0	-	6 / 14	34 / 34	'17 / 21
GM07830	ONT R10	G / G	T / T	C / C	A / A	ATCT / A	AT / A	0 / 0	-	6 / 14	30 / 37	'17 / 21
GM08211	Illumina	G / G	T / T	C / C	A / A	ATCT / A	AT / AT	0 / 0	2 / 2	13 / 14	30 / 30	'24 / 25
GM08211	MGI	G / G	T / T	C / C	A / A	ATCT / A	AT / AT	0 / 0	2 / 2	13 / 14	30 / 30	24 / 25
GM08211	ONT R9	G / G	T / T	C / C	A / A	ATCT / A	AT / AT	0 / 0	-	14 / 14	30 / 30	24 / 24
GM08211	ONT R10	G / G	T / T	C / C	A / A	ATCT / A	AT / AT	0 / 0	-	14 / 14	30 / 30	24 / 24
GM07828	Illumina	G / G	T / T	C / C	A / A	ATCT / A	AT / AT	0 / 0	2 / 2	11 / 13	36	0 / 0
GM07828	MGI	G / G	T / T	C / C	A / A	ATCT / A	AT / AT	0 / 0	2 / 2	11 / 13	47	0 / 0
GM07828	ONT R9	G / G	T / T	C / C	A / A	ATCT / A	AT / AT	0 / 0	-	12 / 12	36	15 / 20
GM07828	ONT R10	G / G	T / T	C / C	A / A	ATCT / A	AT / AT	0 / 0	-	12 / 12	36	9 / 12
GM04099	Illumina	G / G	T / T	C / C	A / A	ATCT / ATCT	AT / AT	0 / 1	2 / 3	5 / 13	30 / 30	20 / 31
GM04099	MGI	G / G	T / T	C / C	A / A	ATCT / ATCT	AT / AT	0 / 1	2 / 3	5 / 13	30 / 30	20 / 31
GM04099	ONT R9	G / G	T / T	C / C	A / A	ATCT / ATCT	AT / AT	0 / 1	-	6 / 14	30 / 30	20 / 30
GM04099	ONT R10	G / G	T / T	C / C	A / A	ATCT / ATCT	AT / AT	0 / 1	-	6 / 14	30 / 30	20 / 31
GM10684	Illumina	G / G	T / T	C / C	A / A	ATCT / ATCT	AT / AT	0 / 0	0 / 2	5 / 5	0 / 0	17 / 18
GM10684	MGI	G / G	T / T	C / C	A / A	ATCT / ATCT	AT / AT	0 / 0	0 / 2	5 / 5	0 / 0	17 / 18
GM10684	ONT R9	G / G	T / T	C / C	A / A	ATCT / ATCT	AT / AT	0 / 0	0 / 2	6 / 6	0 / 0	16 / 20
GM10684	ONT R10	G / G	T / T	C / C	A / A	ATCT / ATCT	AT / AT	0 / 0	0 / 2	6 / 6	0 / 0	16 / 20
GM03990	Illumina	G / G	T / T	C / C	A / A	ATCT / ATCT	AT / AT	0 / 0	2 / 1	14 / 64	30 / 31	0 / 17
GM03990	MGI	G / G	T / T	C / C	A / A	ATCT / ATCT	AT / AT	0 / 0	2 / 1	14 / 57	31 / 31	0 / 17
GM03990	ONT R9	G / G	T / T	C / C	A / A	ATCT / ATCT	AT / AT	0 / 0	-	15 / 78	30 / 30	17 / 17
GM03990	ONT R10	G / G	T / T	C / C	A / A	ATCT / ATCT	AT / AT	0 / 0	-	15 / 79	30 / 30	17 / 19
GM09145	Illumina	G / G	T / T	C / C	A / A	ATCT / ATCT	AT / AT	0 / 0	2 / 1	10 / 12	176	15 / 16
GM09145	MGI	G / G	T / T	C / C	A / A	ATCT / ATCT	AT / AT	0 / 0	2 / 1	10 / 12	111	15 / 16
GM09145	ONT R9	G / G	T / T	C / C	A / A	ATCT / ATCT	AT / AT	0 / 0	-	11 / 11	864	13 / 16
GM09145	ONT R10	G / G	T / T	C / C	A / A	ATCT / ATCT	AT / AT	0 / 0	-	13 / 13	573	16 / 16
GM03620	Illumina	G / G	T / T	C / C	A / A	ATCT / ATCT	AT / AT	0 / 0	2 / 2	5 / 11	29 / 30	18 / 55
GM03620	MGI	G / G	T / T	C / C	A / A	ATCT / ATCT	AT / AT	0 / 0	2 / 2	5 / 11	29 / 30	18 / 68
GM03620	ONT R9	G / G	T / T	C / C	A / A	ATCT / ATCT	AT / AT	0 / 0	-	6 / 12	29 / 29	19 / 58
GM03620	ONT R10	G / G	T / T	C / C	A / A	ATCT / ATCT	AT / AT	0 / 0	-	6 / 12	30 / 30	20 / 60
