# Supplementary material for: Assessing the readiness of Oxford Nanopore sequencing for clinical genomics applications
Source: HighWire-hosted journal article supplement (doi:10.1101/gr.280134.124), 2026-02-11
Supplement: Supplemental_Table_S8.xlsx [file Supplemental_Table_S8.xlsx]

## Sheet: Supplemental Table S8
Supplemental Table S8. Jaccard index values between platforms for SNV and INDEL.
	SNV						INDEL
Sample ID	ILM - MGI	ILM - ONT (R9)	ILM - ONT (R10)	MGI - ONT (R9)	MGI - ONT (R10)	ONT (R9) - ONT (R10)	ILM - MGI	ILM - ONT (R9)	ILM - ONT (R10)	MGI - ONT (R9)	MGI - ONT (R10)	ONT (R9) - ONT (R10)
GM04099	0.90141	0.822002	0.81413	0.796044	0.786829	0.871352	0.808495	0.552061	0.624371	0.52214	0.584738	0.657082
GM10684	0.902717	0.828059	0.820023	0.800279	0.791902	0.871177	0.810727	0.551985	0.613871	0.521806	0.574271	0.649591
GM07828	0.90712	0.828846	0.817712	0.801612	0.785967	0.862428	0.815474	0.554175	0.634623	0.525367	0.596271	0.654563
GM07829	0.904307	0.828202	0.817056	0.804263	0.791654	0.874012	0.811017	0.541422	0.615985	0.513288	0.579152	0.648703
GM07830	0.903511	0.826223	0.816872	0.80011	0.789157	0.871319	0.811446	0.545771	0.624553	0.516245	0.584355	0.650383
GM08211	0.906903	0.832392	0.819207	0.808848	0.795246	0.876183	0.807478	0.551293	0.608407	0.522865	0.570058	0.650029
GM10354	0.910931	0.83211	0.820859	0.804342	0.792397	0.871606	0.812043	0.555253	0.602244	0.526149	0.564448	0.643869
GM13708	0.903519	0.828326	0.819883	0.801027	0.792509	0.876271	0.807858	0.563483	0.618641	0.534493	0.580581	0.665651
GM27630	0.908653	0.832846	0.82015	0.805839	0.791968	0.875513	0.812587	0.556605	0.617217	0.52796	0.579264	0.656706
GM27631	0.91432	0.829356	0.817372	0.80211	0.790111	0.867357	0.812066	0.548527	0.601953	0.517779	0.560958	0.628841
GM27632	0.904313	0.83686	0.825655	0.809703	0.797593	0.87704	0.812913	0.550668	0.611612	0.521728	0.572919	0.649092
GM03620	0.904562	0.830112	0.818898	0.804551	0.792717	0.874435	0.811553	0.547767	0.608458	0.519736	0.568817	0.640323
GM03990	0.901083	0.826888	0.8156	0.800257	0.785346	0.869023	0.809938	0.558101	0.629492	0.525704	0.587326	0.658824
GM09145	0.919528	0.846113	0.838589	0.821685	0.813063	0.885483	0.825687	0.556808	0.627996	0.529551	0.594383	0.657198
GM24143	0.902117	0.827756	0.816228	0.802105	0.790084	0.872546	0.810146	0.553135	0.618545	0.523038	0.576658	0.650385
GM24149	0.905778	0.819382	0.817394	0.79131	0.787527	0.8616	0.810308	0.536367	0.617544	0.50822	0.577853	0.628515
GM24385	0.905904	0.830549	0.820551	0.802671	0.792104	0.873807	0.811947	0.553262	0.60621	0.523417	0.566847	0.64377
Across-samples per-column average	0.906275	0.829766	0.819775	0.803339	0.792128	0.872421	0.811864	0.55157	0.616572	0.522323	0.577582	0.649031
Across all samples	SNV	INDEL
Min	0.785346	0.50822
Mean	0.837284	0.62149
Median	0.823829	0.599112
Max	0.919528	0.825687
